# Supplementary material for: Influence of Tree, Stand, and Site Attributes on Hardwood Product Yield: Insights into the Acadian Forests
Source: MDPI journal article supplement (doi:10.3390/f14020182), 2023-01-18
Supplement: s1 [file s1]

Article

# Supplementary material - Influence of tree, stand, and site attributes on hardwood product yield: insights into the Acadian forests

Caroline Bennemann<sup>1</sup>, Eric R. Labelle <sup>1\*</sup>, Jean-Martin Lussier<sup>2</sup>

<sup>1</sup> Department of Wood and Forest Sciences, Université Laval, 2405 rue de la Terrasse, Québec, QC G1V 0A6, Canada

<sup>2</sup> Canadian Wood Fibre Centre, Natural Resources Canada, 1055 Rue du Peps, Québec, QC G1V 4C7, Canada

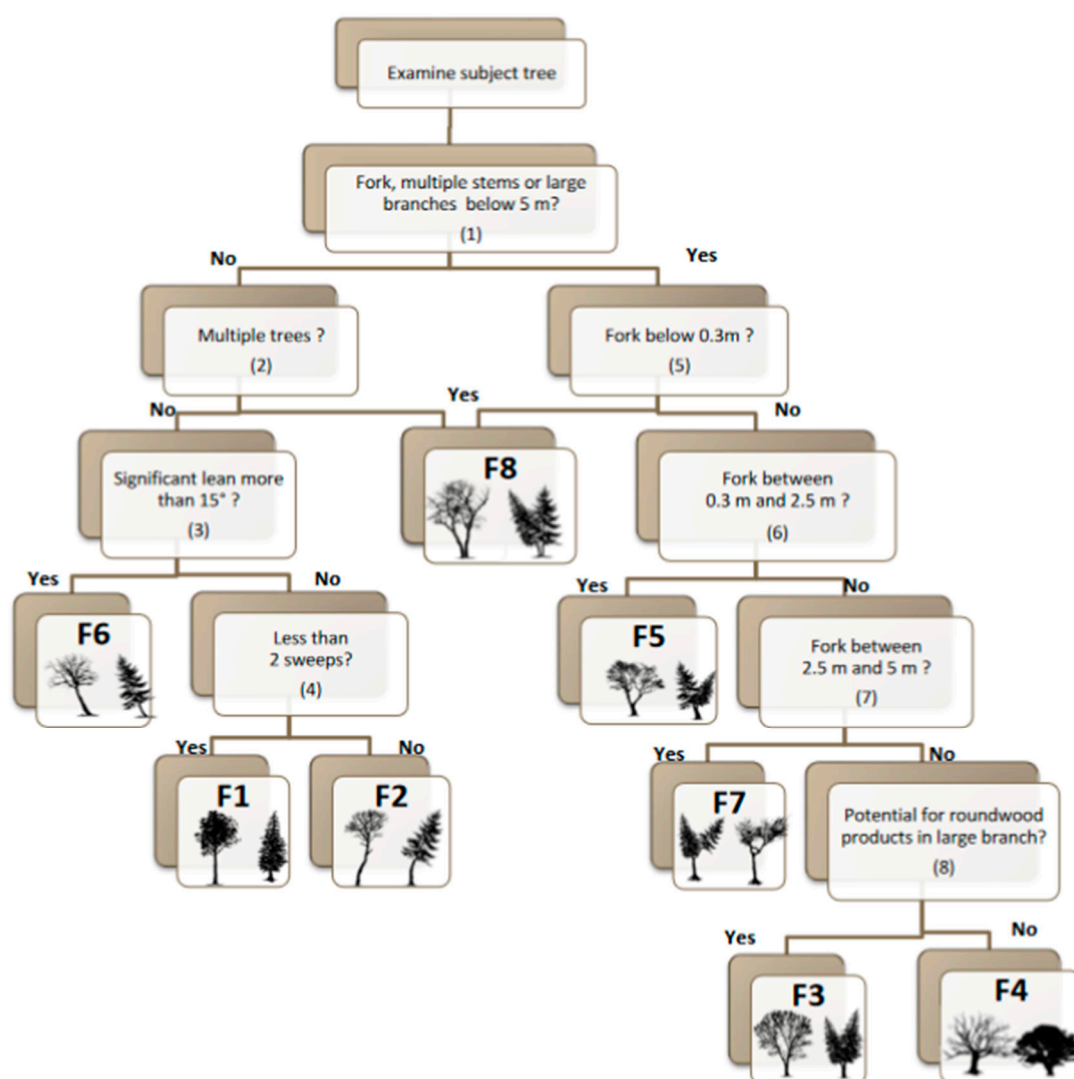

Figure S1: Decision tree for form classification of trees (F1-F8) used in New Brunswick [29].

Table S1: List of variables included in the FAMD on ecoregions.

| <i>Variable</i>       | <i>Data type</i> | <i>Description</i>                                                           |
|-----------------------|------------------|------------------------------------------------------------------------------|
| <i>Ecoregion</i>      | Qualitative      | Land classification of New Brunswick (1 to 7)                                |
| <i>Soil</i>           | Qualitative      | Forest soil units, according to classification of NBDNRED                    |
| <i>Drain</i>          | Qualitative      | Classification of duration needed for water to infiltrate surface            |
| <i>Slope</i>          | Qualitative      | Categories of slopes                                                         |
| <i>Aspect</i>         | Qualitative      | Categories of exposure of terrain                                            |
| <i>Mean_WTB</i>       | Quantitative     | Mean water table depth                                                       |
| <i>Degree day</i>     | Quantitative     | Growing degree days                                                          |
| <i>Degree day 0</i>   | Quantitative     | Growing degree days base 0                                                   |
| <i>Degree day uti</i> | Quantitative     | Growing degree days during growing season                                    |
| <i>Prec_uti</i>       | Quantitative     | Precipitation during growing season                                          |
| <i>Srad uti</i>       | Quantitative     | Sun radiation during growing season                                          |
| <i>Tmax</i>           | Quantitative     | Mean of maximum daily temperatures for period 1981-2010                      |
| <i>Tmean</i>          | Quantitative     | Mean of mean daily temperatures for period 1981-2010                         |
| <i>Tmean_uti</i>      | Quantitative     | Mean of maximum daily temperature during growing season for period 1981-2010 |
| <i>Prec_nonutil</i>   | Quantitative     | Precipitation outside growing season                                         |
| <i>Srad_nonutil</i>   | Quantitative     | Sun radiation outside growing season                                         |

Table S2: ANOVA table (type II) for multinomial analysis of tree species (N = 253 235) with indication of significance levels (\*\*\*; 0).

Analysis of Deviance Table (Type II tests)

Response: groupedSp.relevel

|                             | <i>LR</i> | <i>Chisq</i> | <i>Df</i> | <i>Pr(&gt;Chisq)</i> |     |
|-----------------------------|-----------|--------------|-----------|----------------------|-----|
| <i>DomHwSw</i>              |           | 54093        | 5         | <2e-16               | *** |
| <i>SampleType</i>           |           | 614          | 5         | <2e-16               | *** |
| <i>EcoRegion</i>            |           | 8663         | 30        | <2e-16               | *** |
| <i>DomHwSw:SampleType</i>   |           | -293         | 5         | 1                    |     |
| <i>DomHwSw:EcoRegion</i>    |           | 778          | 30        | <2e-16               | *** |
| <i>SampleType:EcoRegion</i> |           | -102         | 30        | 1                    |     |

Table S3: ANOVA table of relative stand density index (RSDI) with indication of significance levels (\*\*\*: 0; :. 0.05).

|                             | <i>Df</i> | <i>Sum Sq</i> | <i>Mean Sq</i> | <i>F value</i> | <i>Pr(&gt;F)</i> |     |
|-----------------------------|-----------|---------------|----------------|----------------|------------------|-----|
| <i>EcoRegion</i>            | 6         | 2.4           | 0.4052         | 3.919          | 0.000651         | *** |
| <i>DomHwSw</i>              | 1         | 0.3           | 0.3465         | 3.351          | 0.067223         | .   |
| <i>SampleType</i>           | 1         | 1.3           | 1.2775         | 12.355         | 0.000443         | *** |
| <i>EcoRegion:DomHwSw</i>    | 6         | 1.0           | 0.1621         | 1.568          | 0.152068         |     |
| <i>EcoRegion:SampleType</i> | 1         | 2.1           | 2.1484         | 20.778         | 5.25e-06         | *** |
| <i>DomHwSw:SampleType</i>   | 1         | 0.2           | 0.1935         | 1.872          | 0.171318         |     |
| <i>Residuals</i>            | 6772      | 700.2         | 0.1034         |                |                  |     |

Table S4: ANOVA table (type II) for form classes with indication of significance levels (\*\*\*: 0; \*\*: 0.001; \*: 0.01; :. 0.05)..

Analysis of Deviance Table (Type II tests)

Response: Form4revel

|                             | <i>LR</i> | <i>Chisq</i> | <i>Df</i> | <i>Pr(&gt;Chisq)</i> |     |
|-----------------------------|-----------|--------------|-----------|----------------------|-----|
| <i>DomHwSw</i>              |           | 42.17        | 3         | 3.699e-09            | *** |
| <i>Ecoregion</i>            |           | 376.33       | 18        | < 2.2e-16            | *** |
| <i>SampleType</i>           |           | 19.90        | 3         | 0.0001784            | *** |
| <i>groupedSp</i>            |           | 2736.97      | 15        | < 2.2e-16            | *** |
| <i>RSDI</i>                 |           | 17.67        | 3         | 0.0005141            | *** |
| <i>DomHwSw:Ecoregion</i>    |           | 26.13        | 18        | 0.0968100            | .   |
| <i>DomHwSw:SampleType</i>   |           | 17.40        | 3         | 0.0005853            | *** |
| <i>DomHwSw:groupedSp</i>    |           | 57.55        | 15        | 6.627e-07            | *** |
| <i>DomHwSw:RSDI</i>         |           | 5.44         | 3         | 0.1424766            |     |
| <i>Ecoregion:SampleType</i> |           | 21.44        | 18        | 0.2576344            |     |
| <i>Ecoregion:groupedSp</i>  |           | 210.82       | 90        | 1.080e-11            | *** |
| <i>Ecoregion:RSDI</i>       |           | 81.28        | 18        | 5.117e-10            | *** |
| <i>SampleType:groupedSp</i> |           | 120.32       | 15        | < 2.2e-16            | *** |
| <i>SampleType:RSDI</i>      |           | 12.56        | 3         | 0.0056833            | **  |
| <i>groupedSp:RSDI</i>       |           | 28.77        | 15        | 0.0171934            | *   |

Table S5: ANOVA table (type II) for risk classes with indication of significance levels (\*\*\*: 0; \*\*: 0.001; \*: 0.01).

Analysis of Deviance Table (Type II tests)

Response: Riskrelevel

|                             | <i>LR</i> | <i>Chisq</i> | <i>Df</i> | <i>Pr(&gt;Chisq)</i> |     |
|-----------------------------|-----------|--------------|-----------|----------------------|-----|
| <i>DomHwSw</i>              |           | 12.69        | 3         | 0.0053478            | **  |
| <i>Ecoregion</i>            |           | 758.63       | 18        | < 2.2e-16            | *** |
| <i>SampleType</i>           |           | 67.32        | 3         | 1.596e-14            | *** |
| <i>groupedSp</i>            |           | 1629.55      | 15        | < 2.2e-16            | *** |
| <i>RSDI</i>                 |           | 9.81         | 3         | 0.0202681            | *   |
| <i>DomHwSw:Ecoregion</i>    |           | 71.23        | 18        | 2.795e-08            | *** |
| <i>DomHwSw:SampleType</i>   |           | 41.41        | 3         | 5.345e-09            | *** |
| <i>DomHwSw:groupedSp</i>    |           | 92.96        | 15        | 2.776e-13            | *** |
| <i>DomHwSw:RSDI</i>         |           | 0.68         | 3         | 0.8779214            |     |
| <i>Ecoregion:SampleType</i> |           | 64.76        | 18        | 3.404e-07            | *** |
| <i>Ecoregion:groupedSp</i>  |           | 245.34       | 90        | 2.485e-16            | *** |
| <i>Ecoregion:RSDI</i>       |           | 56.43        | 18        | 7.626e-06            | *** |
| <i>SampleType:groupedSp</i> |           | 78.18        | 15        | 1.503e-10            | *** |
| <i>SampleType:RSDI</i>      |           | 9.46         | 3         | 0.0237177            | *   |
| <i>groupedSp:RSDI</i>       |           | 43.37        | 15        | 0.0001377            | *** |

Table S6: ANOVA table for DBH of trees with known localization (N = 253 235) with indication of significance levels (\*\*\*: 0; \*: 0.01).

|                             | <i>Df</i> | <i>Sum Sq</i> | <i>Mean Sq</i> | <i>F value</i> | <i>Pr(&gt;F)</i> |     |
|-----------------------------|-----------|---------------|----------------|----------------|------------------|-----|
| <i>groupedSp</i>            | 5         | 397476        | 79495          | 1633.016       | <2e-16           | *** |
| <i>DomHwSw</i>              | 1         | 6060          | 6060           | 124.489        | <2e-16           | *** |
| <i>Ecoregion</i>            | 6         | 32240         | 5373           | 110.379        | <2e-16           | *** |
| <i>SampleType</i>           | 1         | 195948        | 195948         | 4025.238       | <2e-16           | *** |
| <i>groupedSp:DomHwSw</i>    | 5         | 20264         | 4053           | 83.256         | <2e-16           | *** |
| <i>groupedSp:Ecoregion</i>  | 30        | 74832         | 2494           | 51.241         | <2e-16           | *** |
| <i>groupedSp:SampleType</i> | 5         | 47020         | 9404           | 193.182        | <2e-16           | *** |
| <i>DomHwSw:Ecoregion</i>    | 6         | 9959          | 1660           | 34.098         | <2e-16           | *** |
| <i>DomHwSw:SampleType</i>   | 1         | 306           | 306            | 6.293          | 0.0121           | *   |
| <i>Ecoregion:SampleType</i> | 1         | 3             | 3              | 0.055          | 0.8147           |     |
| <i>Residuals</i>            | 252900    | 12311157      | 49             |                |                  |     |

Table S7: ANOVA table for DBH of trees with information on form group and risk class (N = 25 516) with indication of significance levels (\*\*\*: 0).

|                   | <i>Df</i> | <i>Sum Sq</i> | <i>Mean Sq</i> | <i>F value</i> | <i>Pr(&gt;F)</i> |     |
|-------------------|-----------|---------------|----------------|----------------|------------------|-----|
| <i>Form4</i>      | 3         | 46567         | 15522          | 142.838        | < 2e-16          | *** |
| <i>Risk</i>       | 3         | 10418         | 3473           | 31.955         | < 2e-16          | *** |
| <i>Form4:Risk</i> | 9         | 3060          | 340            | 3.129          | 1.57e-08         | *** |
| <i>Residuals</i>  | 25227     | 2741452       | 109            |                |                  |     |

Table S8: ANOVA of tree height depending on species group, plot dominance and ecoregion (N = 62 292) with indication of significance levels (\*\*\*: 0).

|                            | <i>Df</i> | <i>Sum Sq</i> | <i>Mean Sq</i> | <i>F value</i> | <i>Pr(&gt;F)</i> |     |
|----------------------------|-----------|---------------|----------------|----------------|------------------|-----|
| <i>groupedSp</i>           | 5         | 86 985        | 17 397         | 980.59         | < 2e-16          | *** |
| <i>DomHwSw</i>             | 1         | 3 593         | 3 593          | 202.51         | < 2e-16          | *** |
| <i>EcoRegion</i>           | 6         | 10 084        | 1 681          | 94.73          | < 2e-16          | *** |
| <i>groupedSp:DomHwSw</i>   | 5         | 1 585         | 317            | 17.87          | < 2e-16          | *** |
| <i>groupedSp:EcoRegion</i> | 30        | 8 793         | 293            | 16.52          | < 2e-16          | *** |
| <i>DomHwSw:EcoRegion</i>   | 6         | 1 476         | 246            | 13.87          | 7.98e-16         | *** |
| <i>Residuals</i>           | 62 238    | 1 104 191     | 18             |                |                  |     |

Table S9: ANOVA table of tree height depending on form group and risk class (N = 24 048) with indication of significance levels (\*\*\*: 0; \*: 0.01).

|                   | <i>Df</i> | <i>Sum Sq</i> | <i>Mean Sq</i> | <i>F value</i> | <i>Pr(&gt;F)</i> |     |
|-------------------|-----------|---------------|----------------|----------------|------------------|-----|
| <i>Form4</i>      | 3         | 1055          | 351.6          | 18.177         | 8.91e-12         | *** |
| <i>Risk</i>       | 3         | 178           | 59.5           | 3.075          | 0.0265           | *   |
| <i>Form4:Risk</i> | 9         | 822           | 91.3           | 4.721          | 2.71e-06         | *** |
| <i>Residuals</i>  | 23942     | 463106        | 19.3           |                |                  |     |
